# Supplementary material for: The Healthcare and Societal Costs of Familial Intellectual Disability
Source: MDPI journal article supplement (doi:10.3390/ijerph21030299), 2024-03-04
Supplement: s1 [file s1]

Supplementary Table S2. Estimated average annual cost (standard error) by age group, 2021 AUD

| Age of ID Participant | n  | ID Participant Average Annual Cost |                         |                       |                      |                       |                    |                       |                         |                                                       | Carer and Spouse Average Annual Cost |                      |                      |                              |                                                         | Total Annual Average Cost per Person | Total Annual Average Cost per Household |
|-----------------------|----|------------------------------------|-------------------------|-----------------------|----------------------|-----------------------|--------------------|-----------------------|-------------------------|-------------------------------------------------------|--------------------------------------|----------------------|----------------------|------------------------------|---------------------------------------------------------|--------------------------------------|-----------------------------------------|
|                       |    |                                    |                         |                       |                      |                       |                    |                       |                         | ID Participant Total Average Annual Cost <sup>4</sup> |                                      |                      | State Governm ent    | Private OOP                  | Carer and Spouse Total Average Annual Cost <sup>4</sup> |                                      |                                         |
|                       |    | Commonwealth Government            |                         |                       | State Government     |                       | Private OOP        |                       |                         |                                                       | Commonwealth Government              |                      |                      |                              |                                                         |                                      |                                         |
|                       |    | Healthcare                         | Societal <sup>1</sup>   | Taxes lost            | Healthcare           | Societal <sup>2</sup> | Healthcare         | Societal <sup>3</sup> | Lost income             |                                                       | Societal <sup>5</sup>                | Taxes lost           | Societal             | Carer and spouse lost income |                                                         |                                      |                                         |
| 0 to 4                | 9  | \$12,381<br>(\$5,984)              | \$899<br>(\$842)        | \$0<br>(\$0)          | \$8,664<br>(\$6,325) | \$0<br>(\$0)          | \$624<br>(\$236)   | \$13,326<br>(\$9,562) | \$0<br>(\$0)            | \$35,894<br>(\$16,130)                                | \$10,775<br>(\$4,368)                | \$7,190<br>(\$8,284) | \$0<br>(\$0)         | \$15,386<br>(\$6,346)        | \$15,387<br>(\$6,346)                                   | \$51,281<br>(\$18,785)               | \$79,608<br>(\$29,161)                  |
| 5 to 18               | 85 | \$8,037<br>(\$990)                 | \$31,076<br>(\$5,456)   | \$627<br>(\$142)      | \$2,751<br>(\$772)   | \$20,547<br>(\$1,623) | \$1,034<br>(\$362) | \$2,131<br>(\$554)    | \$ 5,134<br>(\$998)     | \$69,574<br>(\$5,973)                                 | \$9,004<br>(\$1,006)                 | \$8,556<br>(\$1,545) | \$998<br>(\$432)     | \$10,296<br>(\$1,806)        | \$11,293<br>(\$1,989)                                   | \$80,867<br>(\$6,222)                | \$125,536<br>(\$9,659)                  |
| 19 to 29              | 35 | \$3,489<br>(\$693)                 | \$59,410<br>(\$11,498)  | \$14,076<br>(\$1,236) | \$624<br>(\$200)     | \$0<br>(\$0)          | \$358<br>(\$125)   | \$1,060<br>(\$249)    | \$44,605<br>(\$ 3,161)  | \$87,654<br>(\$11,616)                                | \$7,098<br>(\$1,488)                 | \$3,600<br>(\$1,530) | \$1,960<br>(\$997)   | \$8,352<br>(\$2,167)         | \$10,311<br>(\$2,249)                                   | \$97,965<br>(\$11,255)               | \$152,080<br>(\$11,472)                 |
| 30 to 39              | 15 | \$3,523<br>(\$547)                 | \$114,816<br>(\$34,348) | \$28,647<br>(\$1,229) | \$1,284<br>(\$412)   | \$724<br>(\$724)      | \$227<br>(\$100)   | \$377<br>(\$218)      | \$ 91,248<br>(\$ 3,823) | \$189,783<br>(\$33,573)                               | \$4,399<br>(\$1,547)                 | \$1,836<br>(\$1,583) | \$1,850<br>(\$1,261) | \$6,594<br>(\$2,064)         | \$8,445<br>(\$2,809)                                    | \$198,228<br>(\$33,833)              | \$307,725<br>(\$52,522)                 |
| 40 to 60              | 19 | \$8,782<br>(\$4,038)               | \$96,858<br>(\$20,620)  | \$9,638<br>(\$1,926)  | \$5,635<br>(\$3,999) | \$2,285<br>(\$1043)   | \$738<br>(\$218)   | \$1,295<br>(\$1,098)  | \$ 31,482<br>(\$ 8,783) | \$119,489<br>(\$27,178)                               | \$6,087<br>(\$1,806)                 | \$380<br>(\$2,854)   | \$0<br>(\$0)         | \$0<br>(\$0)                 | \$0<br>(\$0)                                            | \$119,489<br>(\$27,178)              | \$185,492<br>(\$42,191)                 |

- Notes:
- <sup>1</sup>Comprises of welfare payments, special education and disability supports (including NDIS support accommodation, aids, appliances, and modifications to house or car costs.
- <sup>2</sup>Comprises of accommodation supports and special education costs.
- <sup>3</sup>Expenses for aids, home and vehicle modification, accommodation, supplements/non-prescription medicines/special diets.
- <sup>4</sup>Welfare payments and taxes lost were excluded to avoid double counting.
- <sup>5</sup>Comprises of welfare payments and housing support costs.
