# Supplementary material for: The Healthcare and Societal Costs of Familial Intellectual Disability
Source: MDPI journal article supplement (doi:10.3390/ijerph21030299), 2024-03-04
Supplement: s1 [file s1]

Supplementary Table S1: Source of Cost Estimates and Attributing Perspective of Items Surveyed<sup>1</sup>

| Item                                                                                                                                                                                                                                                                          | Source of Cost Estimates                                                                           | Perspective                |
|-------------------------------------------------------------------------------------------------------------------------------------------------------------------------------------------------------------------------------------------------------------------------------|----------------------------------------------------------------------------------------------------|----------------------------|
| Utilisation of Healthcare Services – ID Participant                                                                                                                                                                                                                           |                                                                                                    |                            |
| Hospital Admissions                                                                                                                                                                                                                                                           | AR-DRG and linked health data                                                                      | Government                 |
| Emergency Department Admissions                                                                                                                                                                                                                                               | URG and linked data                                                                                | Government                 |
| Medical Services (general practitioner, neurologist, paediatrician, psychiatrist, other)                                                                                                                                                                                      | Linked Medicare data                                                                               | Government and Private OOP |
| Allied Health (physiotherapy, occupational therapy, speech pathology, psychology/counselling/ social work, podiatrist, dentist, nutritionist/dietician, optometrist, other)                                                                                                   | Linked Medicare data                                                                               | Government and Private OOP |
| Prescription Medication                                                                                                                                                                                                                                                       | Linked Medicare data                                                                               | Government and Private OOP |
| Complimentary health (naturopath, chiropractor, osteopath, other)                                                                                                                                                                                                             | Survey responses                                                                                   | Private OOP                |
| Alternative medicines (herbal medicines, natural remedies, special diet supplements, other)                                                                                                                                                                                   | Survey responses                                                                                   | Private OOP                |
| Non-prescriptions Medication                                                                                                                                                                                                                                                  | Survey responses                                                                                   | Private OOP                |
| Accommodation and Respite Care                                                                                                                                                                                                                                                |                                                                                                    |                            |
| ID Participant Main Place of Residence (home, residential care, specialised disability accommodation (SDA), supported independent living (SIL), public housing, with another relative, in a separate house owned by carer)                                                    | Residential care fees, including the accommodation fee and the basic daily living fee <sup>2</sup> | Government                 |
|                                                                                                                                                                                                                                                                               | SIL Accommodation fee <sup>2</sup>                                                                 | Government                 |
|                                                                                                                                                                                                                                                                               | Public Housing Rent: Up to 25-30% less than private market rent for tenants <sup>2</sup>           | Government and Private OOP |
| Use of Respite Care (in-home, out-of-home, residential respite care)                                                                                                                                                                                                          | Respite Care Fees <sup>2</sup>                                                                     | Government                 |
| Government Transfer Payments                                                                                                                                                                                                                                                  |                                                                                                    |                            |
| Welfare payments (no welfare payments, age pension, Newstart allowance, parenting payment or parenting payment single, service pension, disability support pension (paid by Centrelink or Department of Veteran Affairs), wife pension or widow allowance, partner allowance, | Survey Responses                                                                                   | Government                 |

|                                                                                                                                                                                                                                                                                                                                                                                    |                                                                                                    |                            |
|------------------------------------------------------------------------------------------------------------------------------------------------------------------------------------------------------------------------------------------------------------------------------------------------------------------------------------------------------------------------------------|----------------------------------------------------------------------------------------------------|----------------------------|
| sickness allowance or special benefit, youth allowance (as a full-time student or jobseeker), Austudy/Abstudy, mobility allowance, rent assistance, carer payment and carer allowance, other)                                                                                                                                                                                      |                                                                                                    |                            |
| Education Support                                                                                                                                                                                                                                                                                                                                                                  |                                                                                                    |                            |
| Previous 12 months public or private education attendance at: early intervention centre, preschool/childcare, school mainstream class with aide, school mainstream class without an aide, school mild ID class, school other ID class, school only for children with disabilities, technical and further education (TAFE)/technical school, residential treatment centre or school | Survey Response and government school fees contribution depending on level of support <sup>2</sup> | Government and Private OOP |
| Utilisation of Nappies, Aids, Appliances and Modifications, and Transport Costs                                                                                                                                                                                                                                                                                                    |                                                                                                    |                            |
| Nappies                                                                                                                                                                                                                                                                                                                                                                            | Survey Responses                                                                                   | Government and Private OOP |
| Aids and appliances (walking aids/crutches, standard wheelchair, electric wheelchair, lifting apparatus, peg feeding equipment, visual aids (includes glasses, braille books), hearing aids, communication aids, orthotics/special shoes, other)                                                                                                                                   | Survey Responses                                                                                   | Government and Private OOP |
| Modifications to care or home (stairs, bedroom, external, bathrooms, hallways, kitchen, living room, other)                                                                                                                                                                                                                                                                        | Survey Responses                                                                                   | Government and Private OOP |
| Transport cost and subsidy (none, bus service, taxi transport subsidy scheme, other)                                                                                                                                                                                                                                                                                               | Survey Responses                                                                                   | Government and Private OOP |
| Income and Employment                                                                                                                                                                                                                                                                                                                                                              |                                                                                                    |                            |
| Previous 12 months debt, savings and income (earned income, interest from savings, welfare payments, other)                                                                                                                                                                                                                                                                        | Survey Responses                                                                                   | Government and Private OOP |
| Carer and spouse work status (full-time, including maternity leave or other paid leave, part-time (includes maternity or other paid leave, unemployed and looking for work, not employed and not looking for work)                                                                                                                                                                 | Survey Responses                                                                                   | Government and Private OOP |
| ID participant employment in previous 12 months (open/unsupported employment,                                                                                                                                                                                                                                                                                                      | Survey Responses                                                                                   | Government and Private OOP |

|                                                                                                                                                                                                |  |  |
|------------------------------------------------------------------------------------------------------------------------------------------------------------------------------------------------|--|--|
| supported employment, Australian Disability Enterprise (Sheltered Workshop), family employment, adult day services, TAFE/technical school (supported access scheme, transition to work scheme) |  |  |
|------------------------------------------------------------------------------------------------------------------------------------------------------------------------------------------------|--|--|

1.To year 2021

2.For further details see Schofield, D. et al (2022) [20]
